# Supplementary material for: Hypercoagulability and Mortality of Patients with Stroke and Active Cancer: The OASIS-CANCER Study
Source: PubMed Central journal article supplement — J Stroke. 2016 Dec 12;19(1):77–87. doi: 10.5853/jos.2016.00570 (PMC5307941; doi:10.5853/jos.2016.00570), 2016-12-12
Supplement: jos-2016-00570-supple1.pdf [file jos-2016-00570-supple1.pdf]

**Supplementary Table 1.** Univariate and multivariate Cox proportional hazard models for overall survival

|                                  | Overall survival              |                               | 1-year survival               |                               |
|----------------------------------|-------------------------------|-------------------------------|-------------------------------|-------------------------------|
|                                  | Univariate HR<br>(95% CI)     | Multivariate HR*<br>(95% CI)  | Univariate HR<br>(95% CI)     | Multivariate HR*<br>(95% CI)  |
| D-dimer quartiles (range, µg/mL) |                               |                               |                               |                               |
| Q1 (< 2.08)                      | (Ref)                         | (Ref)                         |                               |                               |
| Q2 (2.08–9.06)                   | 2.01 (1.35–2.99) <sup>‡</sup> | 1.44 (0.92–2.26)              | 2.30 (1.45–3.67) <sup>‡</sup> | 1.62 (0.95–2.76)              |
| Q3–Q4 (> 9.06)                   | 3.08 (2.15–4.40) <sup>‡</sup> | 2.19 (1.46–3.31) <sup>‡</sup> | 3.78 (2.49–5.75) <sup>‡</sup> | 2.70 (1.68–4.35) <sup>‡</sup> |
| Systemic metastasis              | 3.51 (2.51–4.91) <sup>‡</sup> | 2.91 (1.95–4.34) <sup>‡</sup> | 3.48 (2.39–5.07) <sup>‡</sup> | 2.96 (1.86–4.70) <sup>‡</sup> |
| Stroke mechanism <sup>†</sup>    | 1.75 (1.30–2.37) <sup>‡</sup> |                               | 1.99 (1.41–2.81) <sup>‡</sup> |                               |
| Age                              | 1.00 (0.99–1.01)              |                               | 1.00 (0.98–1.01)              |                               |
| NIHSS                            | 1.03 (1.01–1.06) <sup>‡</sup> | 1.03 (1.01–1.06) <sup>‡</sup> | 1.04 (1.01–1.06) <sup>‡</sup> | 1.03 (1.00–1.06) <sup>‡</sup> |
| Hepatobiliary/pancreatic cancer  | 2.01 (1.45–2.77) <sup>‡</sup> | 2.25 (1.54–3.29) <sup>‡</sup> | 2.08 (1.49–2.90) <sup>‡</sup> | 2.23 (1.51–3.28) <sup>‡</sup> |
| Adenocarcinoma                   | 1.13 (0.84–1.52)              |                               | 0.87 (0.63–1.20)              | 0.68 (0.47–1.00) <sup>‡</sup> |
| Atrial fibrillation              | 0.91 (0.57–1.45)              |                               | 0.83 (0.49–1.41)              |                               |

\*Multivariate models adjusted for variables used in univariate analysis with a forward stepwise method; <sup>†</sup>Cryptogenic vs conventional mechanisms (reference); <sup>‡</sup>*P* < 0.05.

Q1, Q2, Q3, and Q4 denote quartiles.
