# Supplementary material for: Hypercoagulability and Mortality of Patients with Stroke and Active Cancer: The OASIS-CANCER Study
Source: PubMed Central journal article supplement — J Stroke. 2016 Dec 12;19(1):77–87. doi: 10.5853/jos.2016.00570 (PMC5307941; doi:10.5853/jos.2016.00570), 2016-12-12
Supplement: jos-2016-00570-supple2.pdf [file jos-2016-00570-supple2.pdf]

**Supplementary Table 2.** Multivariate Cox proportional hazard models of overall survival in subgroups

|                                  | Systemic metastasis |                    | Stroke mechanism      |                        |
|----------------------------------|---------------------|--------------------|-----------------------|------------------------|
|                                  | Yes                 | No                 | Cryptogenic mechanism | Conventional mechanism |
| D-dimer quartiles (range, µg/mL) |                     |                    |                       |                        |
| Q1 (< 2.08)                      | (Ref)               | (Ref)              | (Ref)                 | (Ref)                  |
| Q2 (2.08–9.06)                   | 1.47 (0.84–2.57)    | 1.42 (0.61–3.30)   | 1.96 (0.94–4.06)      | 1.19 (0.59–2.37)       |
| Q3–Q4 (> 9.06)                   | 2.24 (1.40–3.60)*   | 5.70 (2.35–13.81)* | 2.61 (1.30–5.24)*     | 5.47 (2.07–14.44)*     |

Values are presented as multivariate hazard ratio (95% confidence interval).

Multivariate models adjusted for age, systemic metastasis, stroke mechanism, NIHSS, primary cancer type, adenocarcinoma histology, and atrial fibrillation with a forward stepwise method.

\*Statistically significant.

Q1, Q2, Q3, and Q4 denote quartiles.
